# Supplementary material for: Membrane bridging by Munc13-1 is crucial for neurotransmitter release
Source: eLife. 2019 Feb 28;8:e42806. doi: 10.7554/eLife.42806 (PMC6407922; doi:10.7554/eLife.42806)
Supplement: Figure 1—source data 1. [file elife-42806-fig1-data1.xlsx]

## Sheet: Detailed  statistic Figure 1
Figure #	Panel	Parameter measured	Statistical Test	Number of replicates (N)	Sample name	Cells per replicate	Total # cells (n)	Mean±SEM	Comparison		p-value
Figure 1	1 C	EPSC amplitude (nA)	Mann Whitney test	2	DKO + Mun13-1 WT	30,20	50	1.56±0.2	WT vs. ∆C2C		< 0.0001	****
					DKO + Munc13-1 ∆C2C	20,18	38	0.04±0.01
	1 E	Sucrose charge (pC)	Mann Whitney test	2	Mun13-1 WT	30,19	49	168.4±24.98	WT vs. ∆C2C		< 0.0001	****
					DKO + Munc13-1 ∆C2C	20,10	30	29.5±8.55
	1 F	Pvr (%)	Mann Whitney test	2	Mun13-1 WT	30,19	49	7.06±0.7	WT vs. ∆C2C		< 0.001	***
					DKO + Munc13-1 ∆C2C	14,7	21	2.99±0.7
