# Supplementary material for: Membrane bridging by Munc13-1 is crucial for neurotransmitter release
Source: eLife. 2019 Feb 28;8:e42806. doi: 10.7554/eLife.42806 (PMC6407922; doi:10.7554/eLife.42806)
Supplement: Figure 7—source data 1. [file elife-42806-fig7-data1.xlsx]

## Sheet: Detailed  statistic Figure 7
Figure #	Panel	Parameter measured	Statistical Test	Number of replicates (N)	Sample name	Cells per replicate	Total # cells (n)	Mean±SEM	Comparison		p-value
Figure 7	7 D	mEPSC frequency	Kruskal Wallis test	3	DKO + Mun13-1 WT	14,12,16	42	4.39±0.6	WT vs.	R1598E	< 0.001	***
										F1658E	< 0.001	***
										R1598E/F1658E	< 0.001	***
					DKO + Munc13-1 R1598E	15,10,16	41	1.92±0.5	R1598E vs.	WT	< 0.001	***
										F1658E	0.17	ns
										R1598E/F1658E	>0.99	ns
					DKO + Munc13-1 F1658E	13,9,10	32	0.77±0.2	F1658E vs.	WT	< 0.001	***
										R1598E	0.17	ns
										R1598E/F1658E	>0.99	ns
					DKO + Munc13-1 R1598E/F1658E	12,8,12	32	1.3±0.3	R1598E/F1658E vs.	WT	< 0.001	***
										R1598E	>0.99	ns
										F1658E	>0.99	ns
	7 E	EPSC amplitude	Kruskal Wallis test	3	DKO + Mun13-1 WT	15,14,21	50	2.75±0.4	WT vs.	R1598E	< 0.001	***
										F1658E	< 0.001	***
										R1598E/F1658E	< 0.001	***
					DKO + Munc13-1 R1598E	16,16,21	53	0.78±0.2	R1598E vs.	WT	< 0.001	***
										F1658E	< 0.001	***
										R1598E/F1658E	< 0.001	***
					DKO + Munc13-1 F1658E	21,18,20	59	0.06±0.02	F1658E vs.	WT	< 0.001	***
										R1598E	< 0.001	***
										R1598E/F1658E	>0.999	ns
					DKO + Munc13-1 R1598E/F1658E	16,13,20	49	0.06±0.02	R1598E/F1658E vs.	WT	< 0.001	***
										R1598E	< 0.001	***
										F1658E	>0.999	ns
	7 F	Sucrose charge	Kruskal Wallis test	3	DKO + Mun13-1 WT	15,14,20	49	199±27.7	WT vs.	R1598E	< 0.001	***
										F1658E	< 0.001	***
										R1598E/F1658E	< 0.001	***
					DKO + Munc13-1 R1598E	16,15,21	52	81.43±14.2	R1598E vs.	WT	< 0.001	***
										F1658E	< 0.001	***
										R1598E/F1658E	< 0.001	***
					DKO + Munc13-1 F1658E	18,16,16	50	19.81±7.25	F1658E vs.	WT	< 0.001	***
										R1598E	< 0.001	***
										R1598E/F1658E	>0.999	ns
					DKO + Munc13-1 R1598E/F1658E	16,13,20	49	20.24±6.6	R1598E/F1658E vs.	WT	< 0.001	***
										R1598E	< 0.001	***
										F1658E	>0.999	ns
	7 G	Pvr	Kruskal Wallis test	3	DKO + Mun13-1 WT	15,14,20	49	8.7±1	WT vs.	R1598E	0.008	**
										F1658E	0.002	**
										R1598E/F1658E	0.002	**
					DKO + Munc13-1 R1598E	11,15,14	40	5.3±3.3	R1598E vs.	WT	0.008	**
										F1658E	0.962	ns
										R1598E/F1658E	>0.999	ns
					DKO + Munc13-1 F1658E	6,6,9	21	3.5±1.5	F1658E vs.	WT	0.002	**
										R1598E	>0.999	ns
										R1598E/F1658E	>0.999	ns
					DKO + Munc13-1 R1598E/F1658E	6,7,4	17	4.6±1.0	R1598E/F1658E vs.	WT	0.002	**
										R1598E	>0.999	ns
										F1658E	>0.999	ns
	7 H	Pair Pulse Ratio	Kruskal Wallis test	3	DKO + Mun13-1 WT	13,14,18	45	0.88±0.05	WT vs.	R1598E	< 0.001	***
										F1658E	< 0.001	***
										R1598E/F1658E	< 0.001	***
					DKO + Munc13-1 R1598E	9,13,16	38	1.51±0.13	R1598E vs.	WT	< 0.001	***
										F1658E	>0.999	ns
										R1598E/F1658E	>0.999	ns
					DKO + Munc13-1 F1658E	4,10,4	18	1.70±0.23	F1658E vs.	WT	< 0.001	***
										R1598E	>0.999	ns
										R1598E/F1658E	>0.999	ns
					DKO + Munc13-1 R1598E/F1658E	6,10,2	18	1.37±0.17	R1598E/F1658E vs.	WT	< 0.001	***
										R1598E	>0.999	ns
										F1658E	>0.999	ns
