# Supplementary material for: Membrane bridging by Munc13-1 is crucial for neurotransmitter release
Source: eLife. 2019 Feb 28;8:e42806. doi: 10.7554/eLife.42806 (PMC6407922; doi:10.7554/eLife.42806)
Supplement: Figure 8—source data 1. [file elife-42806-fig8-data1.xlsx]

## Sheet: Detailed  statistic Figure 8
Figure #	Panel	Parameter measured	Statistical Test	Number of replicates (N)	Sample name	Cells per replicate	Total # cells (n)	Mean±SEM	Comparison		p-value
Figure 8	8 D	mEPSC frequency	Mann Whitney test	3	DKO + Mun13-1 WT	14,12,16	42	4.3±0.6	WT vs. K1613A/K1616A		0.5129	ns
					DKO + Munc13-1 K1613A/K1616A	10,12,13	35	4.9±0.9
	8 E	EPSC amplitude	Mann Whitney test	3	DKO + Mun13-1 WT	15,14,21	50	2.75±0.4	WT vs. K1613A/K1616A		0.015	*
					DKO + Munc13-1 K1613A/K1616A	10,15,20	45	1.71±0.3
	8 F	Sucrose charge	Mann Whitney test	3	DKO + Mun13-1 WT	15,14,20	49	203±28	WT vs. K1613A/K1616A		0.055	ns
					DKO + Munc13-1 K1613A/K1616A	10,14,17	41	149±25
	8 G	Pvr	Mann Whitney test	3	DKO + Mun13-1 WT	15,14,20	49	8.6±0.8	WT vs. K1613A/K1616A		0.2168	ns
					DKO + Munc13-1 K1613A/K1616A	11,13,17	41	8.8±1.3
	8 H	Pair Pulse Ratio	Mann Whitney test	3	DKO + Mun13-1 WT	13,14,18	45	0.87±0.05	WT vs. K1613A/K1616A		0.2723	ns
					DKO + Munc13-1 K1613A/K1616A	8,13,17	38	0.99±0.08
