# Supplementary material for: Membrane bridging by Munc13-1 is crucial for neurotransmitter release
Source: eLife. 2019 Feb 28;8:e42806. doi: 10.7554/eLife.42806 (PMC6407922; doi:10.7554/eLife.42806)
Supplement: Figure 9—source data 1. [file elife-42806-fig9-data1.xlsx]

## Sheet: Detailed  statistic Figure 9
Figure #	Panel	Parameter measured	Statistical Test	Number of replicates (N)	Sample name	Cells per replicate	Total # cells (n)	Mean±SEM	Comparison		p-value
Figure 9	9 B	Number of docked SV	Kruskal Wallis test	3	DKO + Mun13-1 WT	69,57,64	190	0.73±0.05	WT vs.	∆C2C	< 0.001	***
										K1613A/K1616A	0.033	*
										R1598E	< 0.001	***
										F1658E	< 0.001	***
										R1598E/F1658E	< 0.001	***
					DKO + Munc13-1 ∆C2C	30,26,30	86	0.25±0.05	∆C2C vs.	WT	< 0.001	***
										K1613A/K1616A	0.002	**
										R1598E	> 0.99	ns
										F1658E	> 0.99	ns
										R1598E/F1658E	> 0.99	ns
					DKO + Munc13-1 K1613A/K1616A	58,65,60	183	0.46±0.05	K1613A/K1616A vs.	WT	0.033	*
										∆C2C	0.002	**
										R1598E	0.002	**
										F1658E	0.002	**
										R1598E/F1658E	0.002	**
					DKO + Munc13-1 R1598E	54,54,59	167	0.27±0.04	R1598E vs.	WT	< 0.001	***
										∆C2C	> 0.99	ns
										K1613A/K1616A	0.002	**
										F1658E	> 0.99	ns
										R1598E/F1658E	0.15	ns
					DKO + Munc13-1 F1658E	53,85,86	224	0.23±0.03	F1658E vs.	WT	< 0.001	***
										∆C2C	> 0.99	ns
										K1613A/K1616A	0.002	**
										R1598E	> 0.99	ns
										R1598E/F1658E	0.93	ns
					DKO + Munc13-1 R1598E/F1658E	31,50,63	144	0.13±0.03	R1598E/F1658E vs.	WT	< 0.001	***
										∆C2C	> 0.99	ns
										K1613A/K1616A	0.002	**
										R1598E	0.15	ns
										F1658E	0.93	ns
