# Supplementary figures and images for: Membrane bridging by Munc13-1 is crucial for neurotransmitter release
Source: eLife journal article supplement (doi:10.7554/elife.42806), 2019-02-28

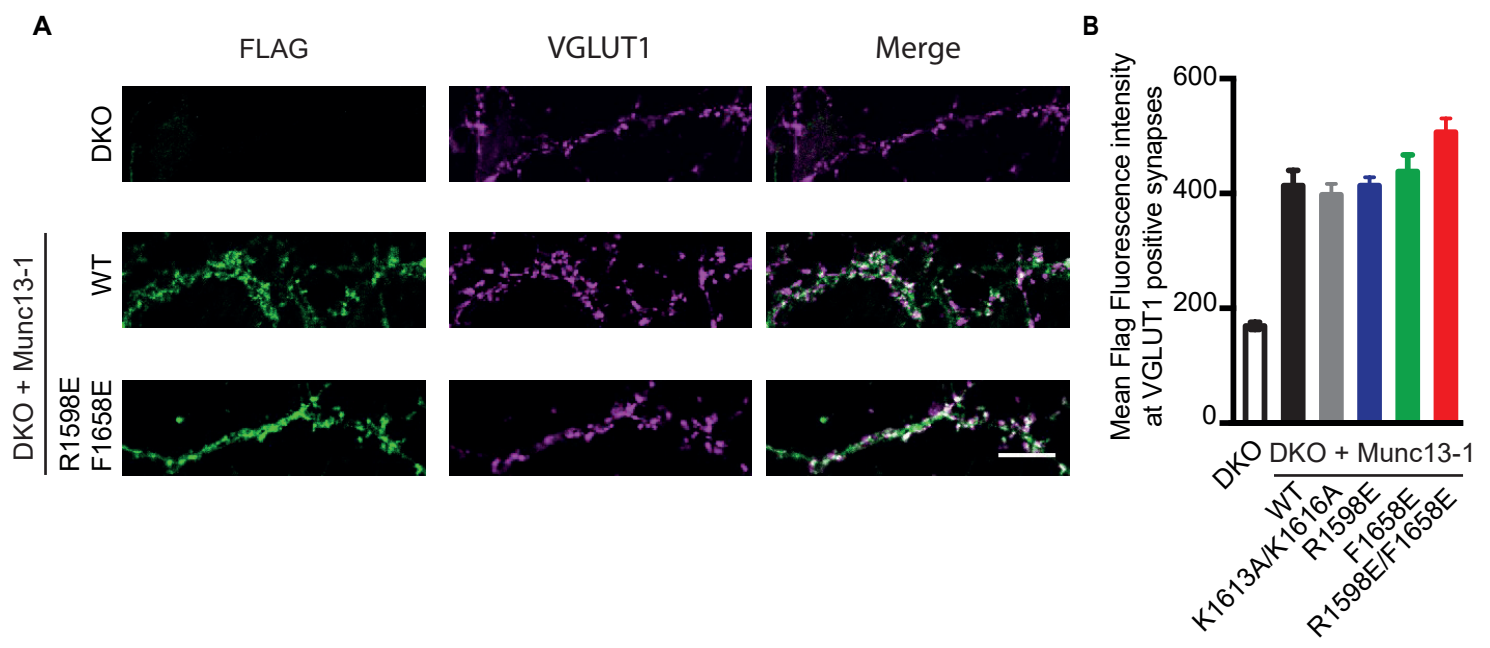

Figure 7 - figure supplement 1  
Quade et al.

Supplement: supp [file elife-42806-supp-v1.zip]

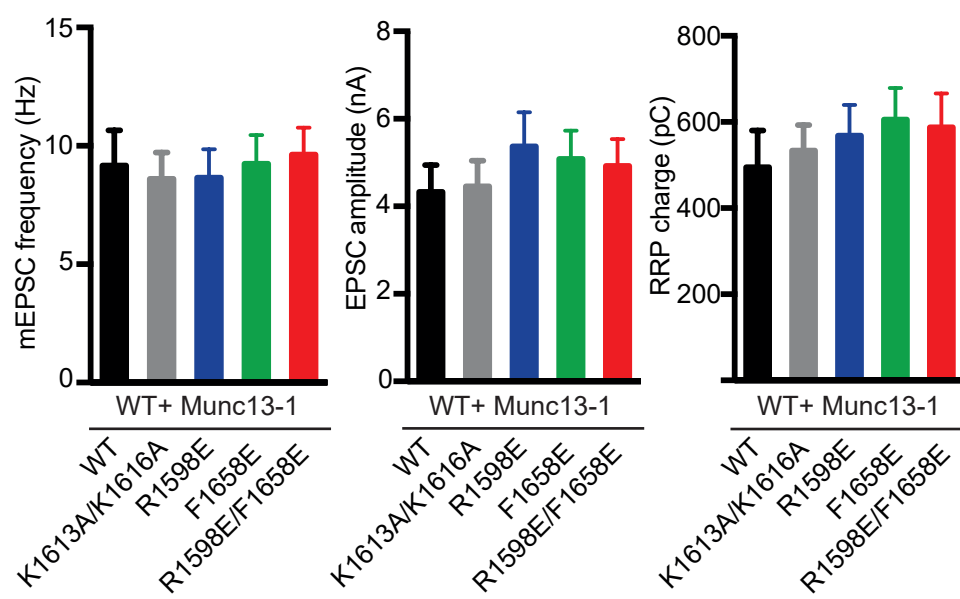

Figure 7 - figure supplement 2  
Quade et al.

Supplement: supp [file elife-42806-supp-v1.zip]

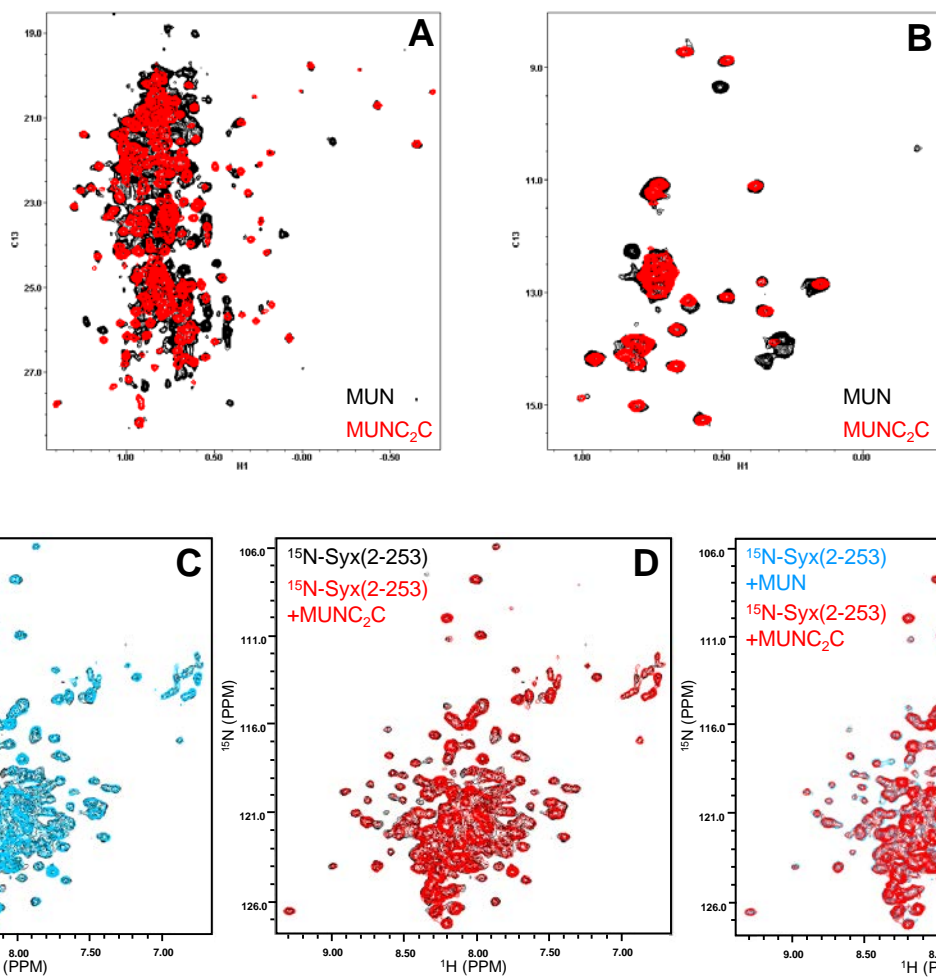

**Figure 2 – figure supplement 1**  
**Quade et al.**

Supplement: supp [file elife-42806-supp-v1.zip]

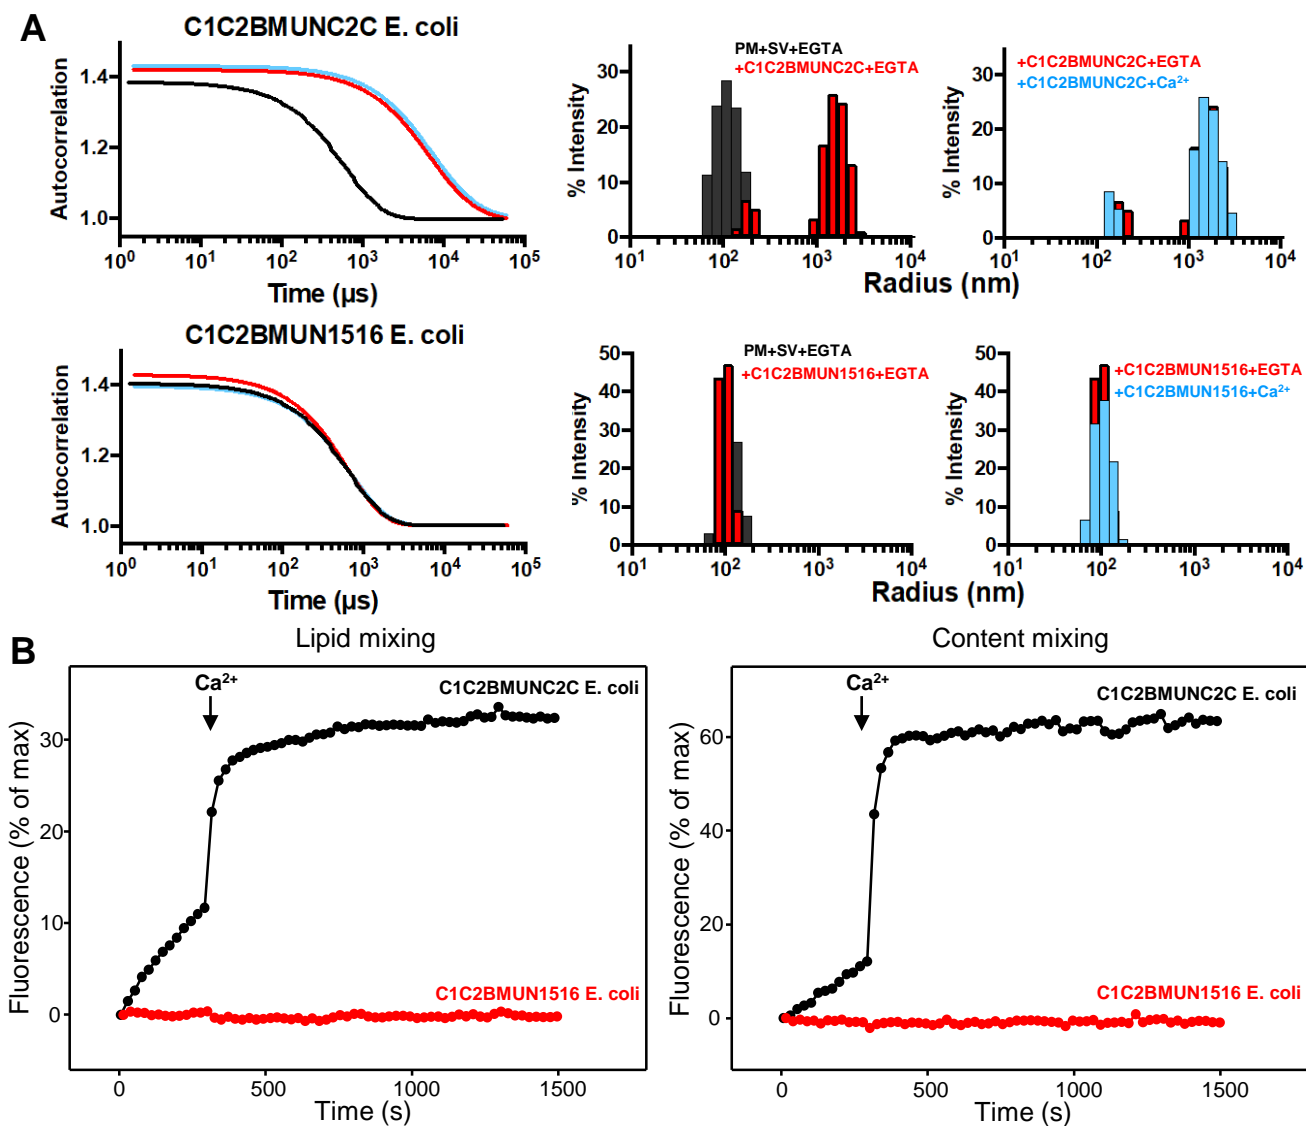

Figure 4 – figure supplement 1  
Quade et al.

Supplement: supp [file elife-42806-supp-v1.zip]

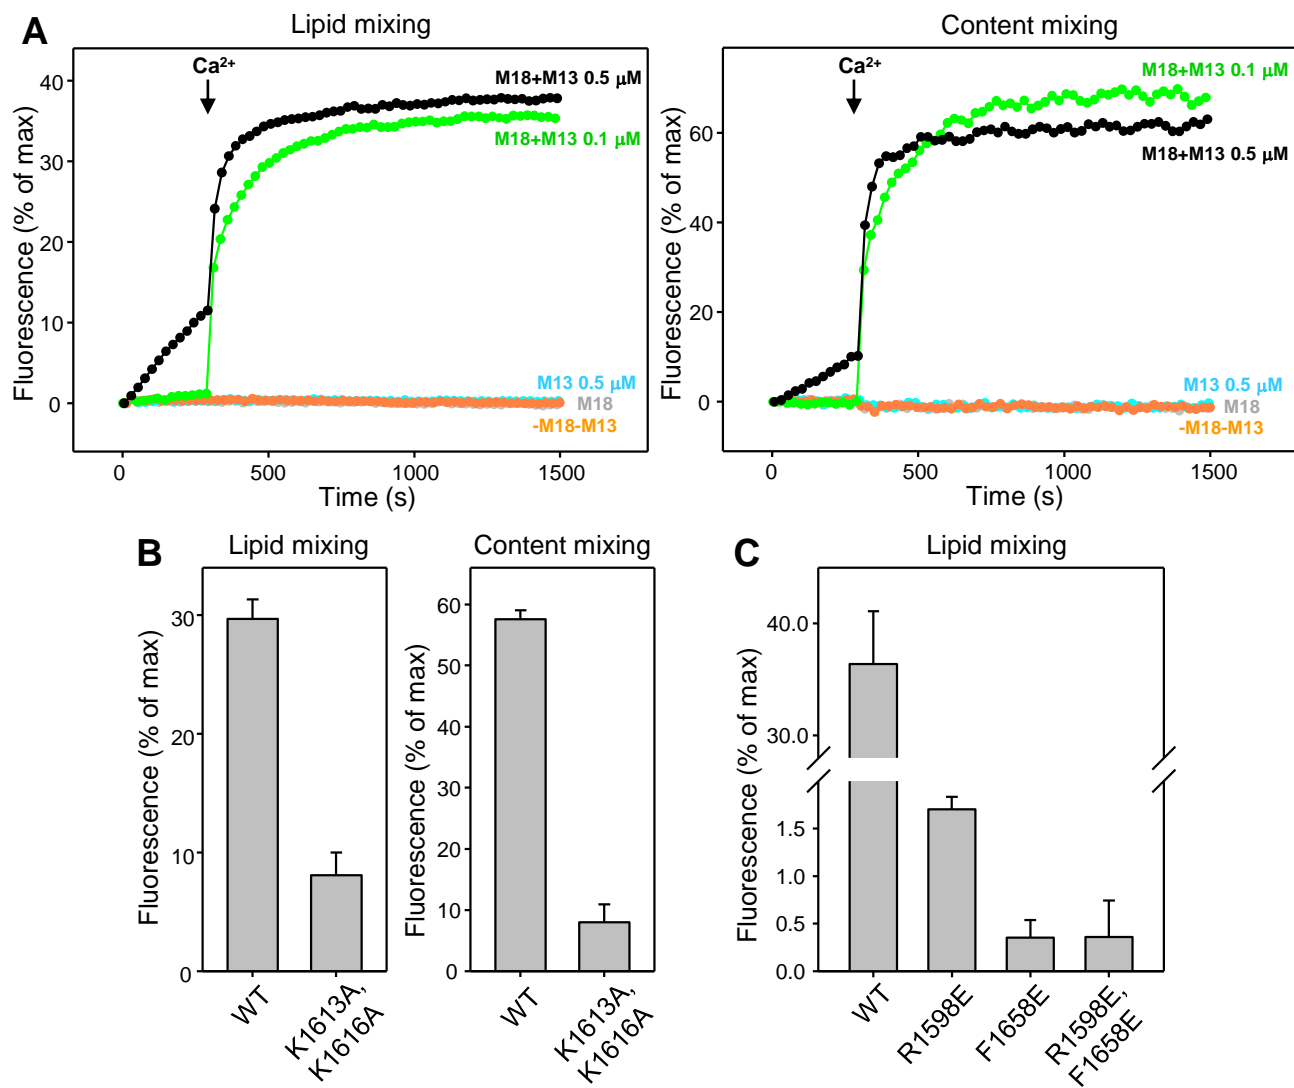

**Figure 6 – figure supplement 1**  
Quade et al.

Supplement: supp [file elife-42806-supp-v1.zip]

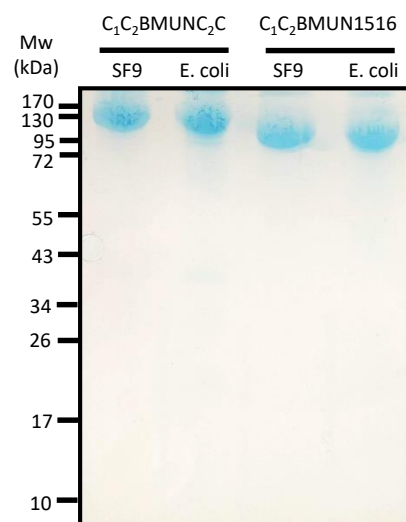

**Figure 4 – figure supplement 2**  
**Quade et al.**

Supplement: supp [file elife-42806-supp-v1.zip]

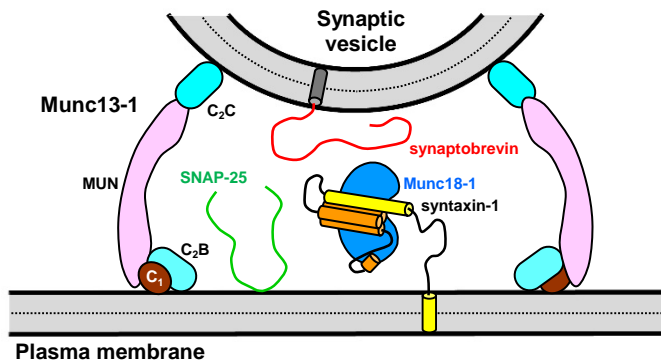

Figure 1 – figure supplement 1  
Quade et al.

Supplement: supp [file elife-42806-supp-v1.zip]
